# Supplementary material for: Synthesis of lactones of ortho-tyrosine, DOPA isomers and tryptophan-ortho-tyrosine hybrid amino acids
Source: Royal Society of Chemistry journal article supplement (doi:10.1039/c1ra00461a), 2011-01-01

## SUPPORTING INFORMATION

### Synthesis of lactones of *ortho*-tyrosine, DOPA isomers and tryptophan-*ortho*-tyrosine hybrid amino acids

H. Surya Prakash Rao,\* Geetha. K., M. Kamalraj

Department of Chemistry, Pondicherry University, Pondicherry – 605 014, India

[hspr.che@pondiuni.edu.in](mailto:hspr.che@pondiuni.edu.in)

|                                                                                                                                                                                                                                                                            |      |
|----------------------------------------------------------------------------------------------------------------------------------------------------------------------------------------------------------------------------------------------------------------------------|------|
| <sup>1</sup> H (300 MHz, DMSO-D <sub>6</sub> :CDCl <sub>3</sub> , 1:9) and <sup>13</sup> C (75 MHz, DMSO-D <sub>6</sub> :CDCl <sub>3</sub> , 1:9) NMR of <i>N</i> 2-methyl-4-[2-(methylamino)-3-nitro-4 <i>H</i> -4-chromenyl]-3-nitro-4 <i>H</i> -2-chromenamine <b>9</b> | S-3  |
| <sup>1</sup> H (300 MHz, CCl <sub>4</sub> :CDCl <sub>3</sub> , 1:1) and <sup>13</sup> C (75 MHz, CCl <sub>4</sub> :CDCl <sub>3</sub> , 1:1) NMR of <i>N</i> 2-methyl-2 <i>H</i> -2,3-chromenediamine <b>10</b>                                                             | S-4  |
| <sup>1</sup> H (300 MHz, CCl <sub>4</sub> :CDCl <sub>3</sub> , 1:1) and <sup>13</sup> C (75 MHz, CCl <sub>4</sub> :CDCl <sub>3</sub> , 1:1) NMR of <i>N</i> -methyl- <i>N</i> -(3-nitro-4 <i>H</i> -2-chromenyl)amine <b>12a</b>                                           | S-5  |
| <sup>1</sup> H (300 MHz, CDCl <sub>3</sub> ) and <sup>13</sup> C (75 MHz, CDCl <sub>3</sub> ) NMR of <i>N</i> -(5-methoxy-3-nitro-4 <i>H</i> -2-chromenyl)- <i>N</i> -methylamine <b>12b</b>                                                                               | S-6  |
| <sup>1</sup> H (300 MHz, CDCl <sub>3</sub> ) and <sup>13</sup> C (75 MHz, CDCl <sub>3</sub> ) NMR of <i>N</i> -(6-methoxy-3-nitro-4 <i>H</i> -2-chromenyl)- <i>N</i> -methylamine <b>12c</b>                                                                               | S-7  |
| <sup>1</sup> H (300 MHz, CDCl <sub>3</sub> ) and <sup>13</sup> C (75 MHz, CDCl <sub>3</sub> ) NMR of <i>N</i> -[7-(benzyloxy)-3-nitro-4 <i>H</i> -2-chromenyl]- <i>N</i> -methylamine <b>12d</b>                                                                           | S-8  |
| <sup>1</sup> H (300 MHz, CDCl <sub>3</sub> :DMSO-D <sub>6</sub> , 9:1) NMR of <i>N</i> -(8-methoxy-3-nitro-4 <i>H</i> -2-chromenyl)- <i>N</i> -methylamine <b>12e</b>                                                                                                      | S-9  |
| <sup>1</sup> H (300 MHz, CDCl <sub>3</sub> ) and <sup>13</sup> C (75 MHz, CDCl <sub>3</sub> ) NMR of <i>N</i> 1-(2-oxo-3,4-dihydro-2 <i>H</i> -3-chromenyl)acetamide <b>13a</b>                                                                                            | S-10 |
| <sup>1</sup> H (300 MHz, CDCl <sub>3</sub> ) and <sup>13</sup> C (75 MHz, CDCl <sub>3</sub> ) NMR of <i>N</i> 1-(5-methoxy-2-oxo-3,4-dihydro-2 <i>H</i> -3-chromenyl)acetamide <b>13b</b>                                                                                  | S-11 |
| <sup>1</sup> H (300 MHz, CDCl <sub>3</sub> ) and <sup>13</sup> C (75 MHz, CDCl <sub>3</sub> ) NMR of <i>N</i> 1-(6-methoxy-2-oxo-3,4-dihydro-2 <i>H</i> -3-chromenyl)acetamide <b>13c</b>                                                                                  | S-12 |
| <sup>1</sup> H (300 MHz, CDCl <sub>3</sub> ) and <sup>13</sup> C (75 MHz, CDCl <sub>3</sub> ) NMR of <i>N</i> 1-[7-(benzyloxy)-2-oxo-3,4-dihydro-2 <i>H</i> -3-chromenyl]acetamide <b>13d</b>                                                                              | S-13 |

|                                                                                                                                                                                                                                                                         |      |
|-------------------------------------------------------------------------------------------------------------------------------------------------------------------------------------------------------------------------------------------------------------------------|------|
| $^1\text{H}$ (300 MHz, $\text{CDCl}_3$ ) and $^{13}\text{C}$ (75 MHz, $\text{CDCl}_3$ ) NMR of <i>N</i> 1-(8-methoxy-2-oxo-3,4-dihydro-2 <i>H</i> -3-chromenyl)acetamide <b>13e</b>                                                                                     | S-14 |
| $^1\text{H}$ (300 MHz, $\text{CDCl}_3$ :DMSO- $\text{D}_6$ , 5:1) and $^{13}\text{C}$ ( $\text{CDCl}_3$ :DMSO- $\text{D}_6$ , 5:1) NMR of <i>N</i> 2-methyl-4-[4-(dimethylamino)phenyl]-3-nitro-4 <i>H</i> -2-chromenamine <b>15</b>                                    | S-15 |
| $^1\text{H}$ (400 MHz, DMSO- $\text{D}_6$ ) and $^{13}\text{C}$ (100 MHz, DMSO- $\text{D}_6$ ) NMR of <i>N</i> -[4-(1 <i>H</i> -3-indolyl)-3-nitro-4 <i>H</i> -2-chromenyl]- <i>N</i> -methylamine <b>16</b>                                                            | S-16 |
| $^1\text{H}$ (400 MHz, $\text{CCl}_4$ : $\text{CDCl}_3$ , 1:1) and $^{13}\text{C}$ (100 MHz, $\text{CCl}_4$ : $\text{CDCl}_3$ , 1:1) and $^{13}\text{C}$ NMR of <i>N</i> -Methyl- <i>N</i> -[3-nitro-4-(1 <i>H</i> -2-pyrrolyl)-4 <i>H</i> -2-chromenyl]amine <b>17</b> | S-17 |
| $^1\text{H}$ (300 MHz, $\text{CDCl}_3$ ) and $^{13}\text{C}$ (75 MHz, $\text{CDCl}_3$ ) NMR of <i>N</i> 1-[4-(1 <i>H</i> -3-Indolyl)-2-oxo-3,4-dihydro-2 <i>H</i> -3-chromenyl]acetamide <b>18</b>                                                                      | S-18 |
| $^1\text{H}$ (300 MHz, $\text{CDCl}_3$ + DMSO- $\text{D}_6$ , 9:1) and $^{13}\text{C}$ (75 MHz, $\text{CDCl}_3$ + DMSO- $\text{D}_6$ , 9:1) NMR of 3-amino-4-(1 <i>H</i> -3-indolyl)-2 <i>H</i> -2-chromenone <b>19</b>                                                 | S-19 |

$^1\text{H}$  (300 MHz,  $\text{DMSO-}D_6$ : $\text{CDCl}_3$ , 1:9) and  $^{13}\text{C}$  (75 MHz,  $\text{DMSO-}D_6$ : $\text{CDCl}_3$ , 1:9) NMR spectra of *N*2-methyl-4-[2-(methylamino)-3-nitro-4*H*-4-chromenyl]-3-nitro-4*H*-2-chromenamine **9**

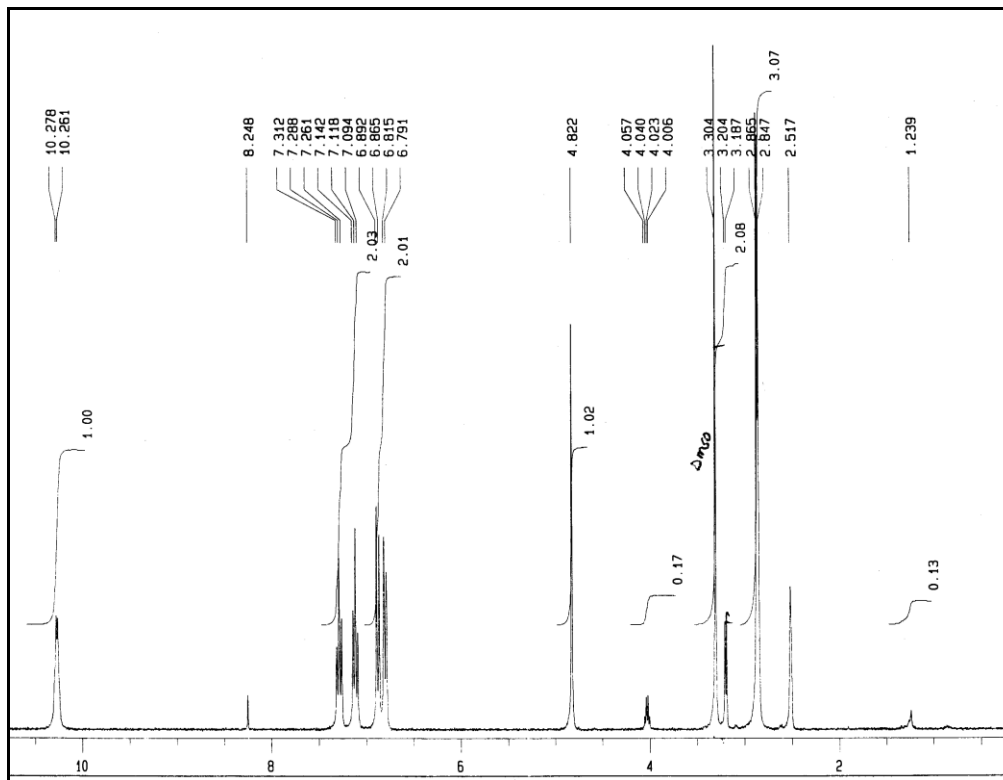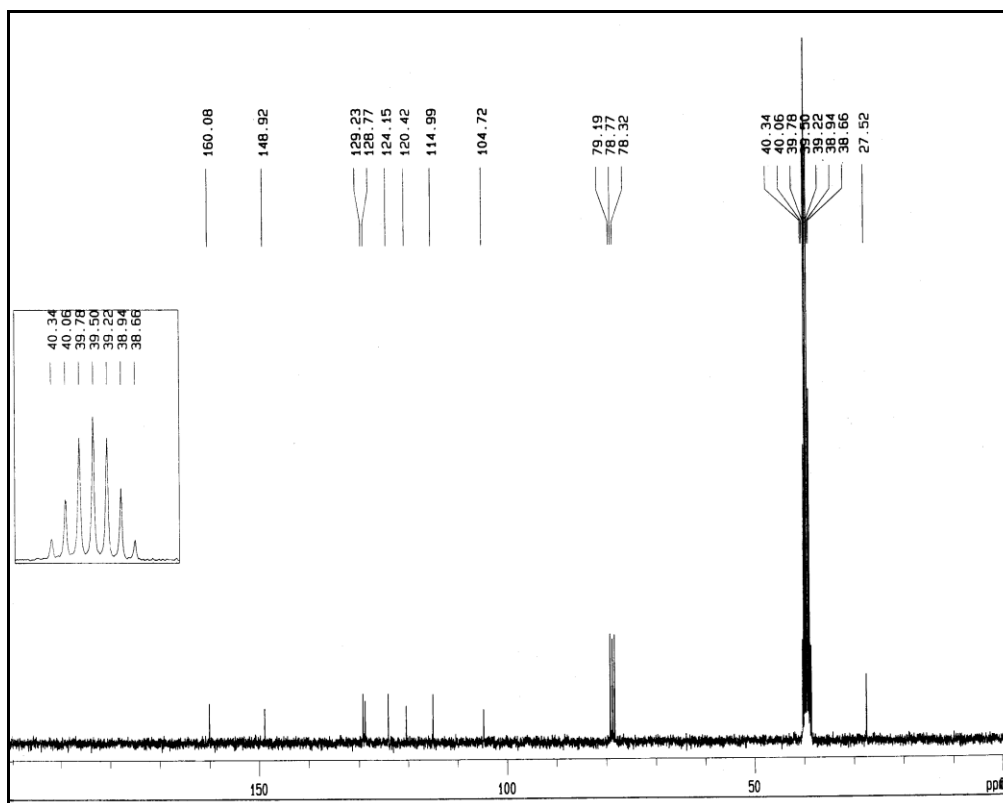

$^1\text{H}$  (300 MHz,  $\text{CCl}_4:\text{CDCl}_3$ , 1:1) and  $^{13}\text{C}$  (75 MHz,  $\text{CCl}_4:\text{CDCl}_3$ , 1:1) NMR spectra of *N*-2-methyl-2*H*-2,3-chromenediamine **10**

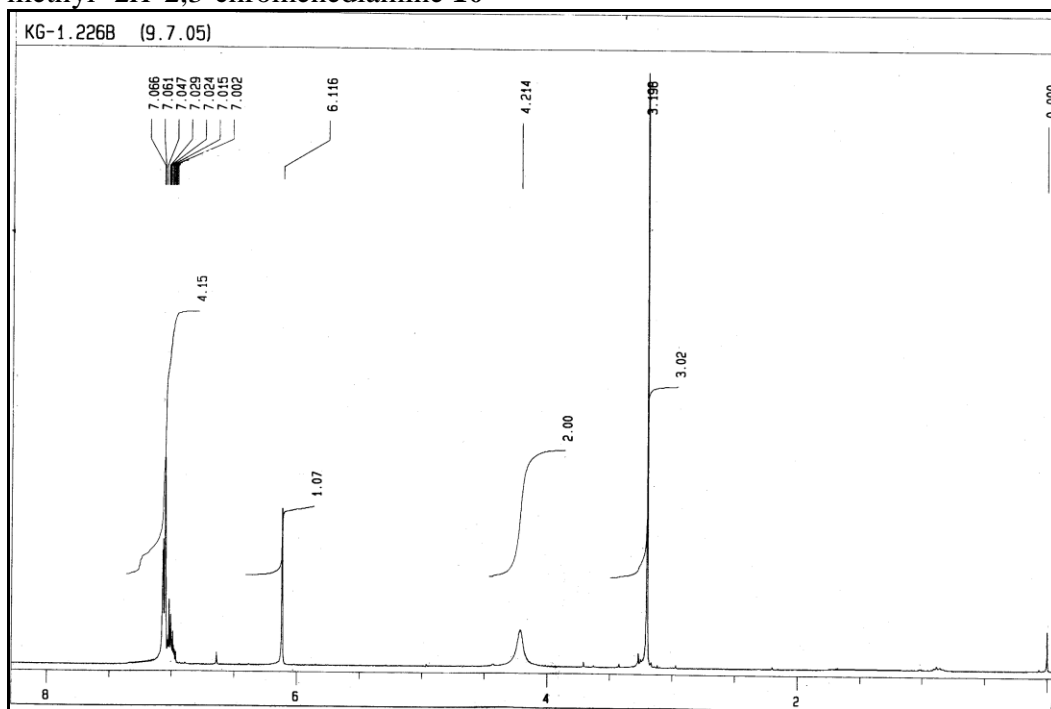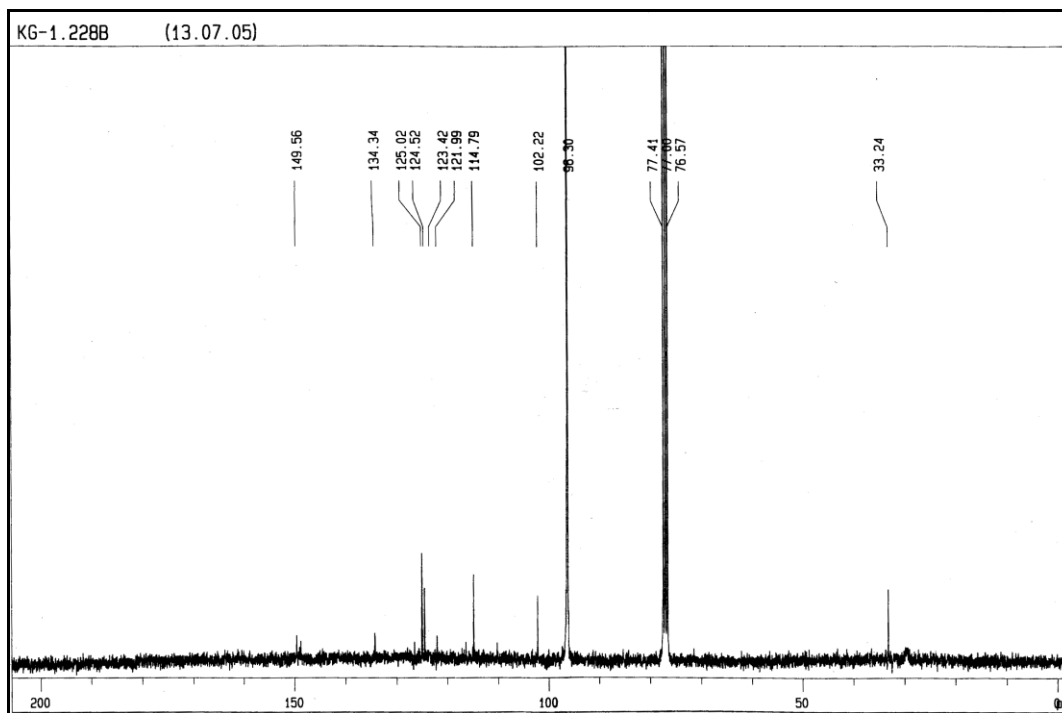

$^1\text{H}$  (300 MHz,  $\text{CCl}_4:\text{CDCl}_3$ , 1:1) and  $^{13}\text{C}$  (75 MHz,  $\text{CCl}_4:\text{CDCl}_3$ , 1:1) NMR spectra of *N*-methyl-*N*-(3-nitro-4*H*-2-chromenyl)amine **12a**

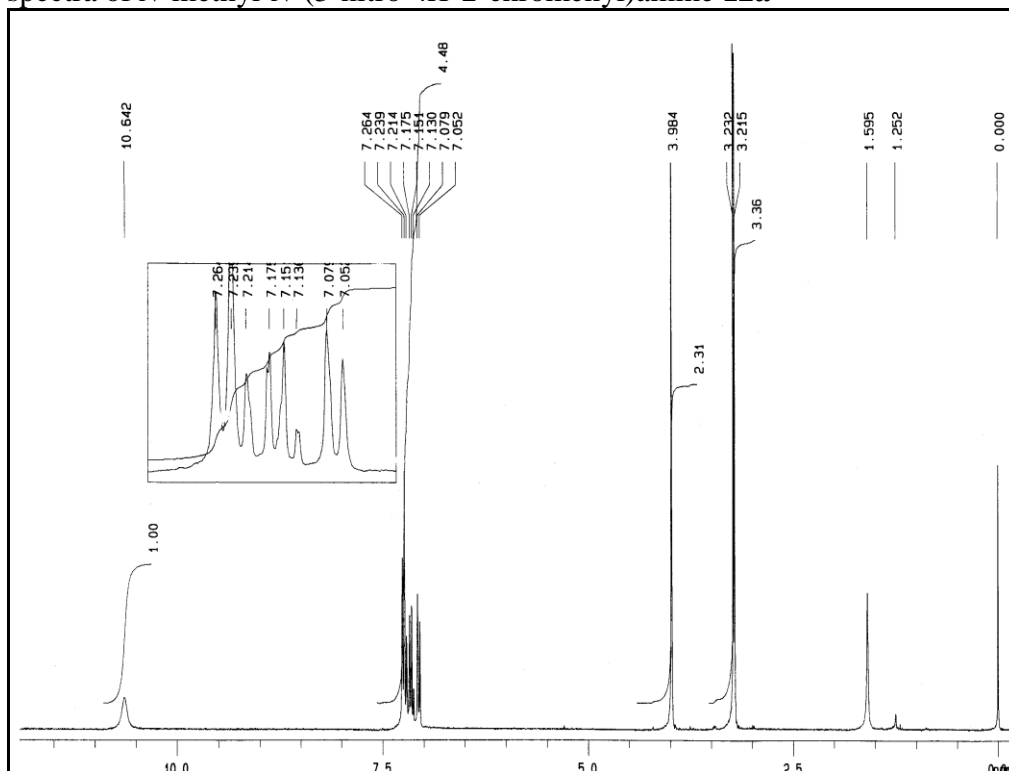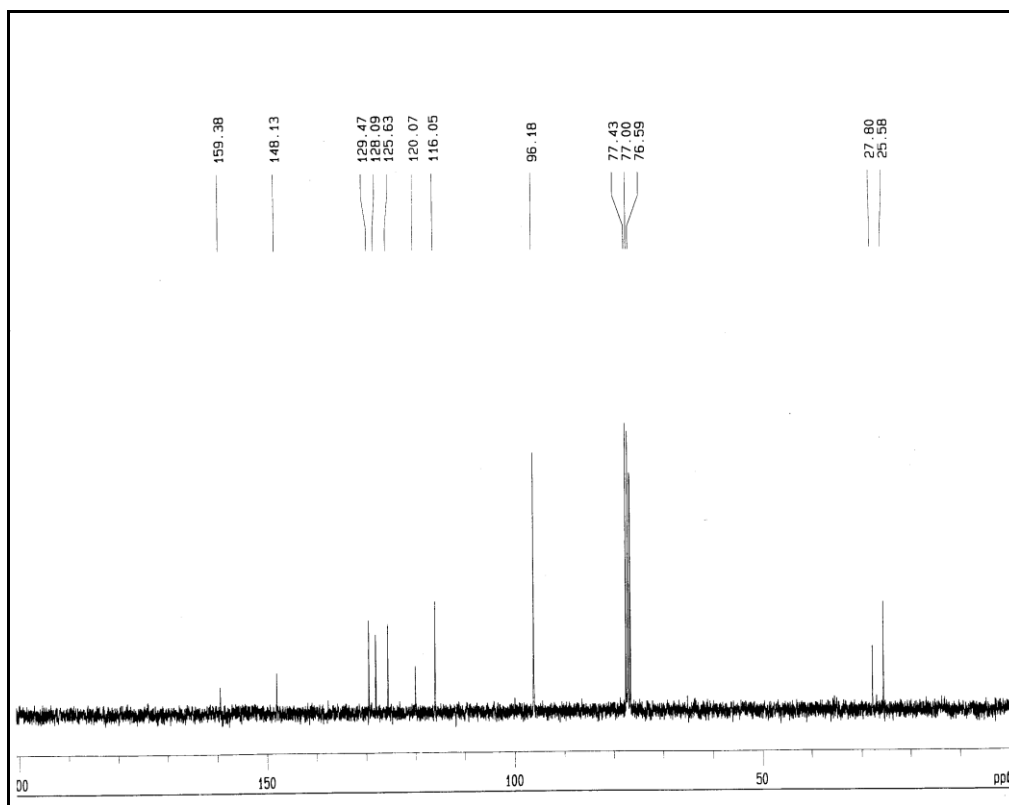

$^1\text{H}$  (300 MHz,  $\text{CDCl}_3$ ) and  $^{13}\text{C}$  (75 MHz,  $\text{CDCl}_3$ ) NMR of *N*-(5-methoxy-3-nitro-4*H*-2-chromenyl)-*N*-methylamine **12b**

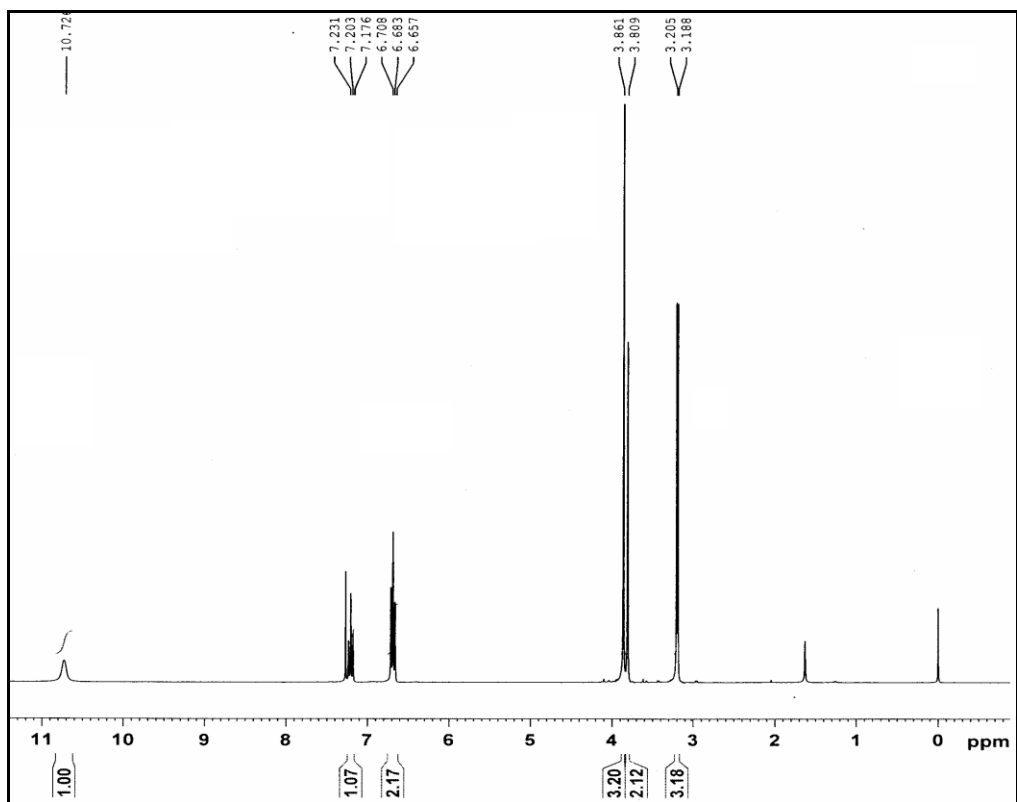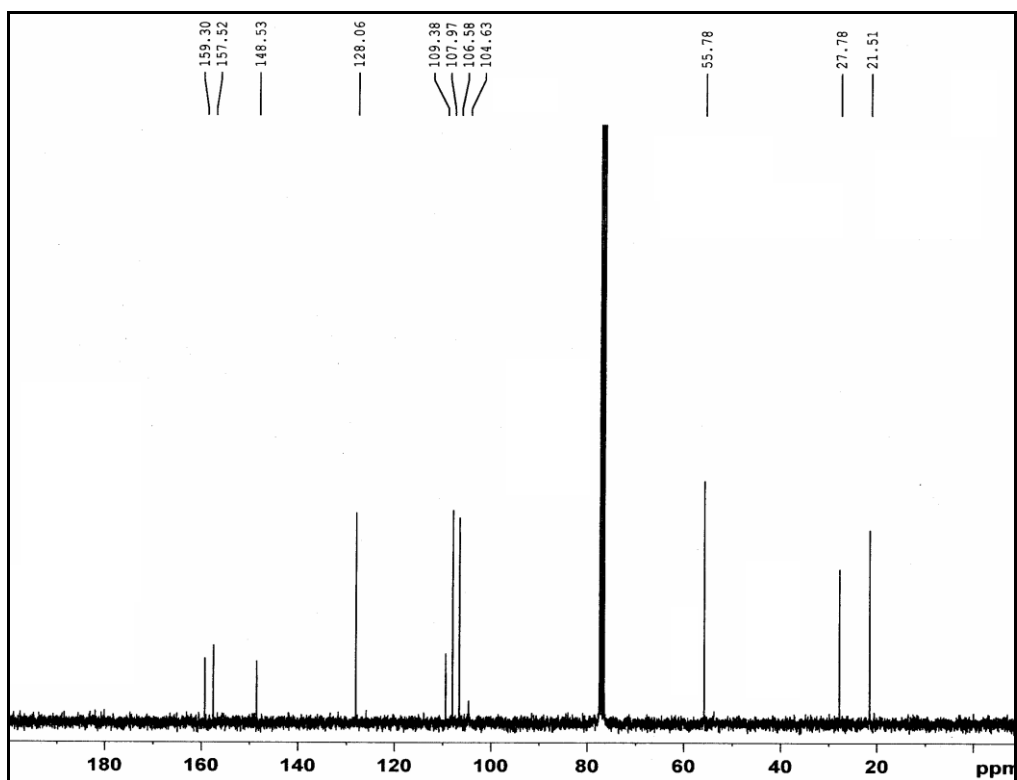

$^1\text{H}$  (300 MHz,  $\text{CDCl}_3$ ) and  $^{13}\text{C}$  (75 MHz,  $\text{CDCl}_3$ ) NMR of *N*-(6-methoxy-3-nitro-4*H*-2-chromenyl)-*N*-methylamine **12c**

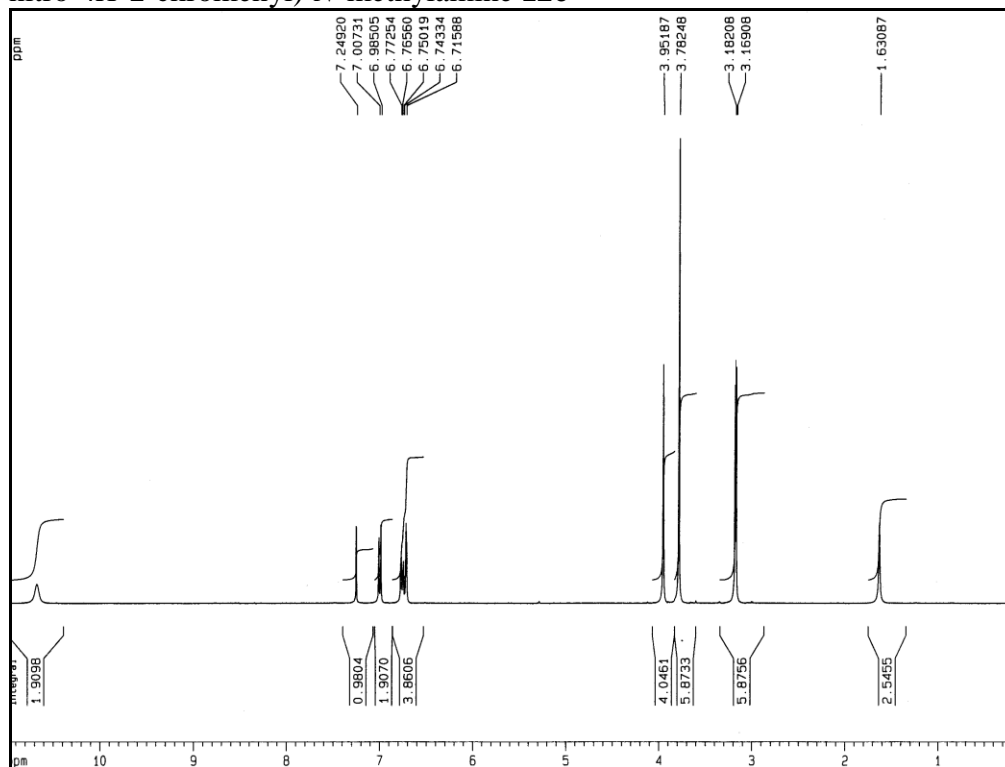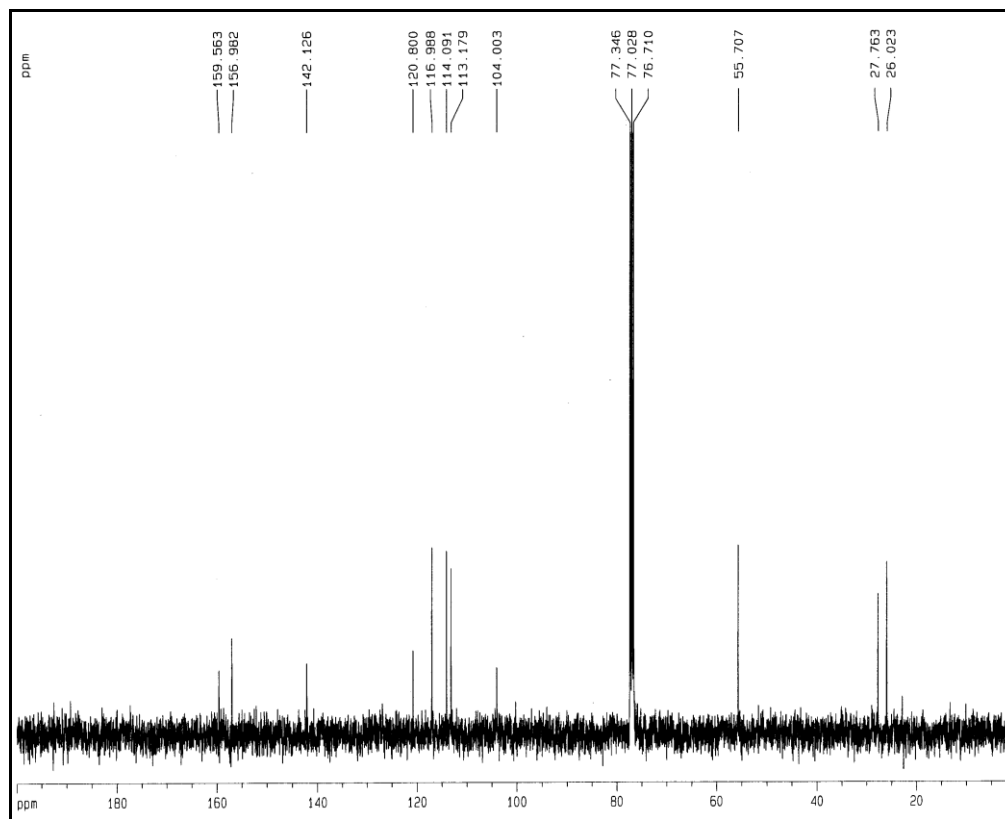

$^1\text{H}$  (300 MHz,  $\text{CDCl}_3$ ) and  $^{13}\text{C}$  (75 MHz,  $\text{CDCl}_3$ ) NMR of *N*-[7-(benzyloxy)-3-nitro-4*H*-2-chromenyl]-*N*-methylamine **12d**

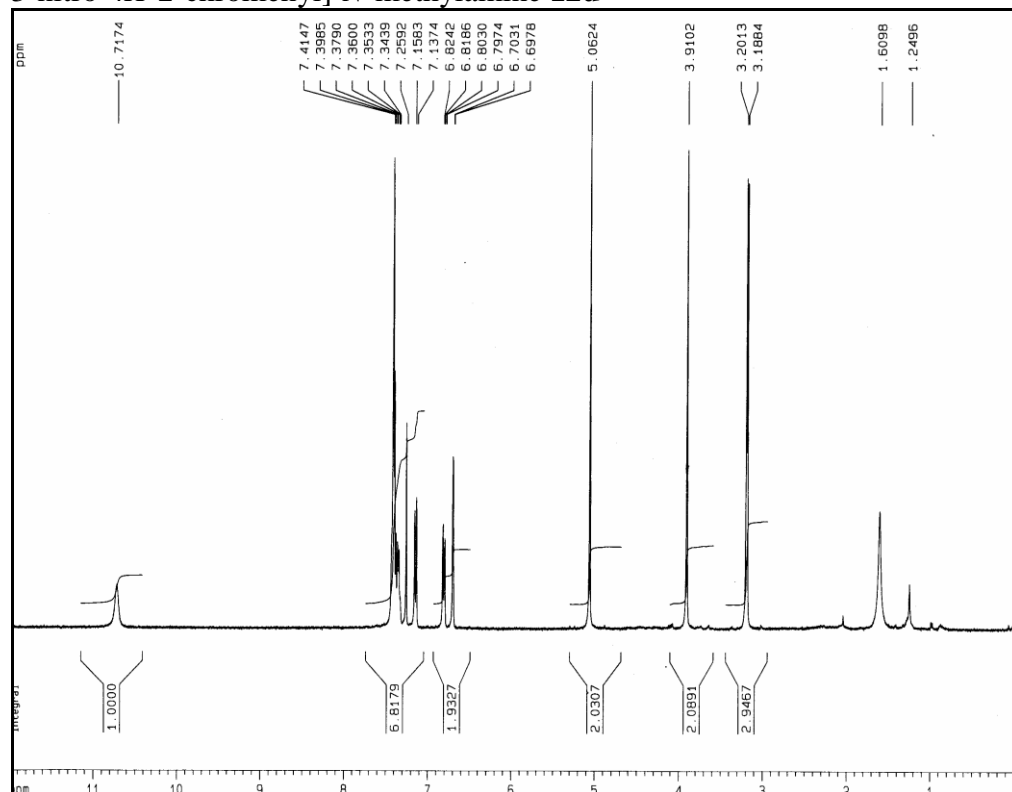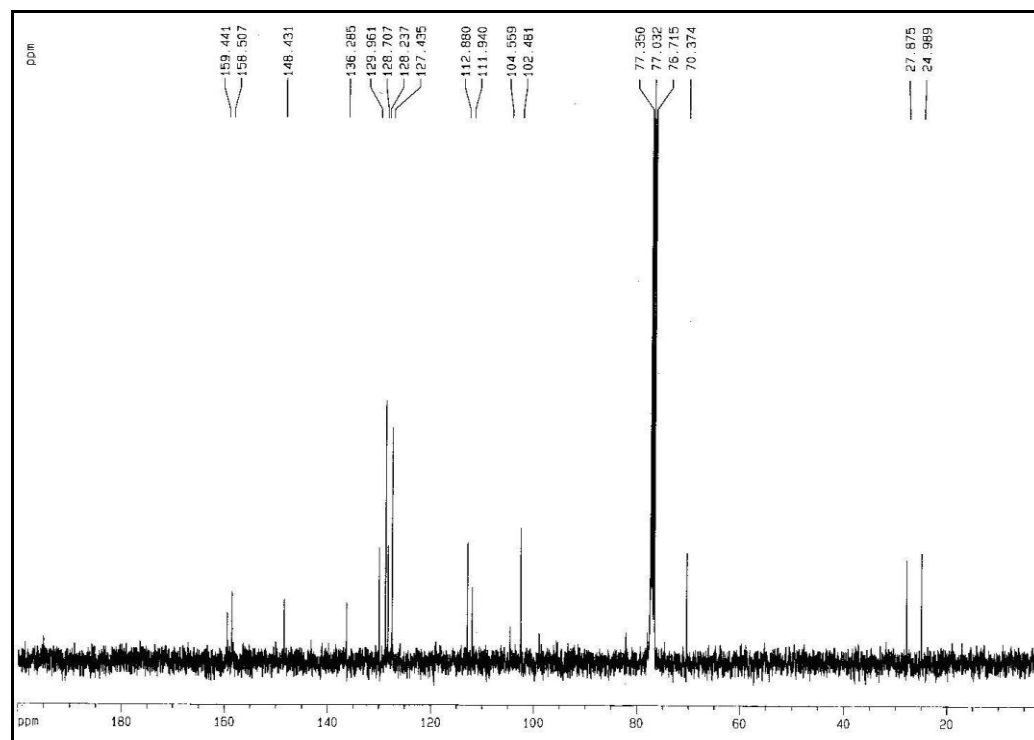



$^1\text{H}$  (400 MHz,  $\text{DMSO-D}_6$ )  $^{13}\text{C}$  (400 MHz,  $\text{DMSO-D}_6$ ) NMR of *N*-(8-methoxy-3-nitro-4*H*-2-chromenyl)-*N*-methylamine **12e**

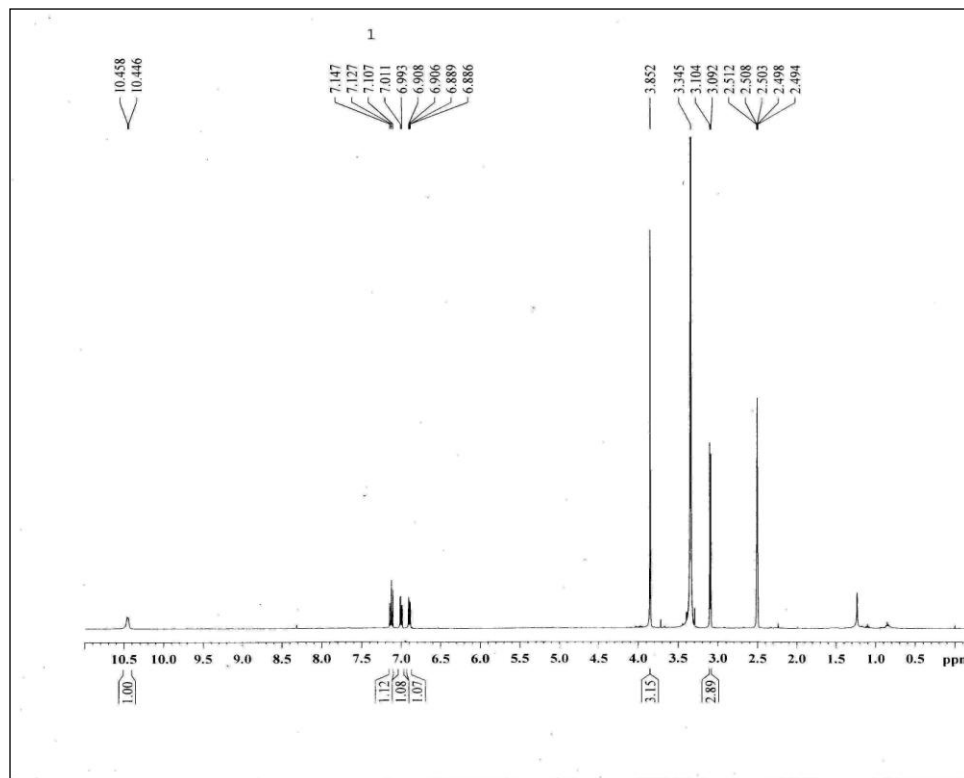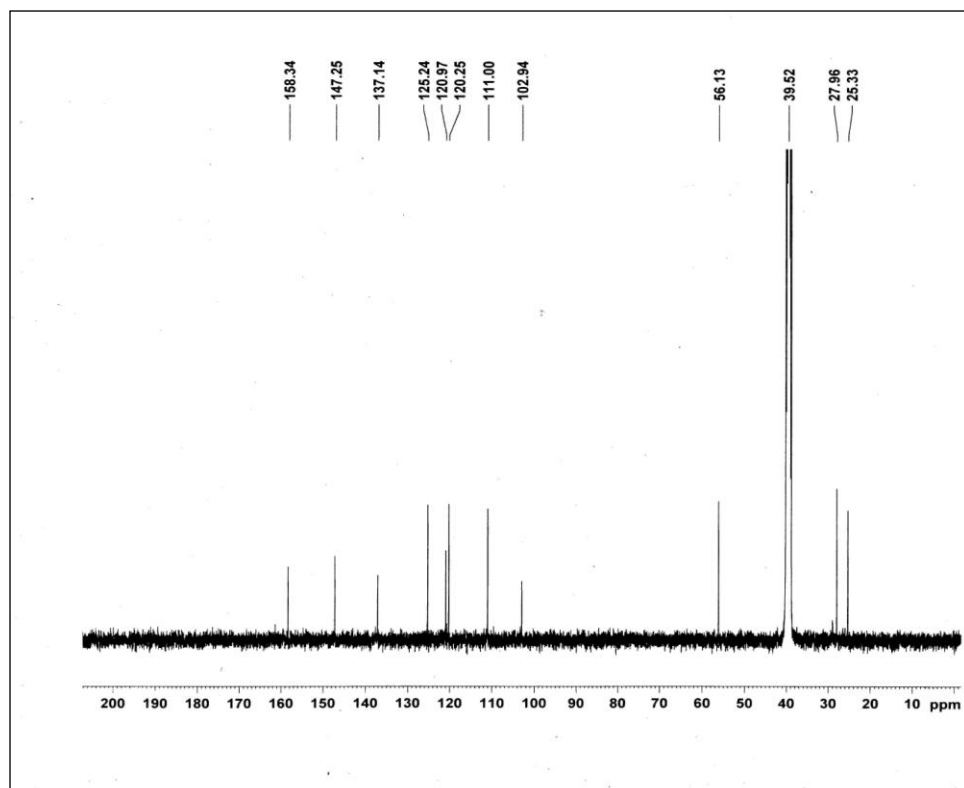

$^1\text{H}$  (300 MHz,  $\text{CDCl}_3$ ) and  $^{13}\text{C}$  (75 MHz,  $\text{CDCl}_3$ ) NMR of *N*1-(2-Oxo-3,4-dihydro-2*H*-3-chromenyl)acetamide **13a**

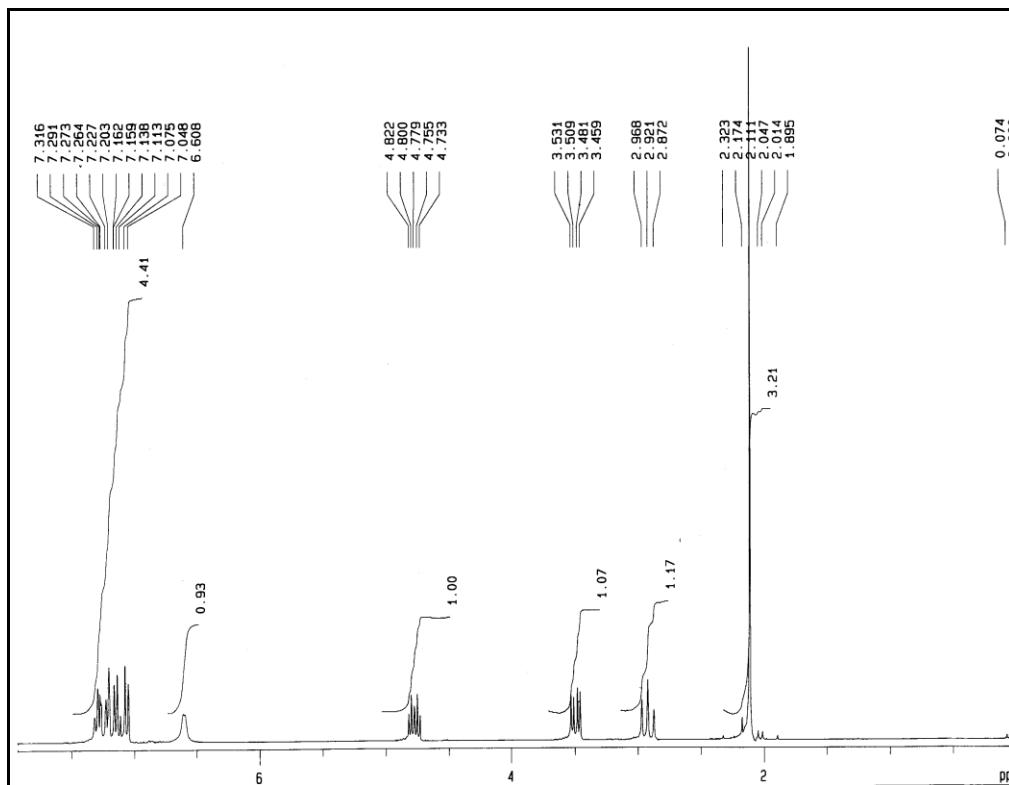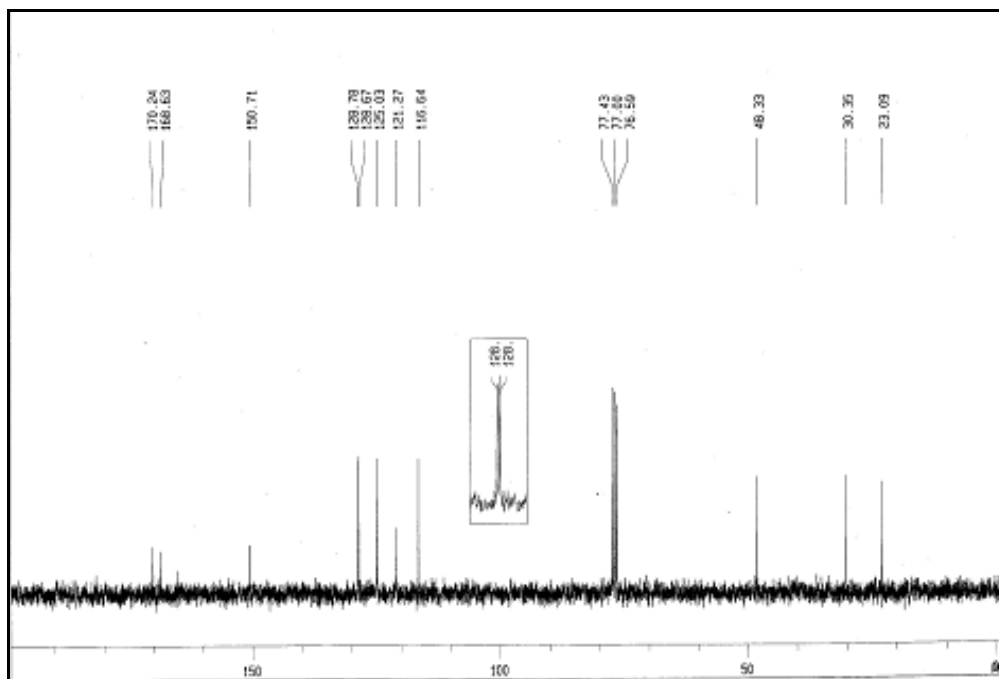

$^1\text{H}$  (300 MHz,  $\text{CDCl}_3$ ) and  $^{13}\text{C}$  (75 MHz,  $\text{CDCl}_3$ ) NMR of *N*-1-(5-methoxy-2-oxo-3,4-dihydro-2*H*-3-chromenyl)acetamide **13b**

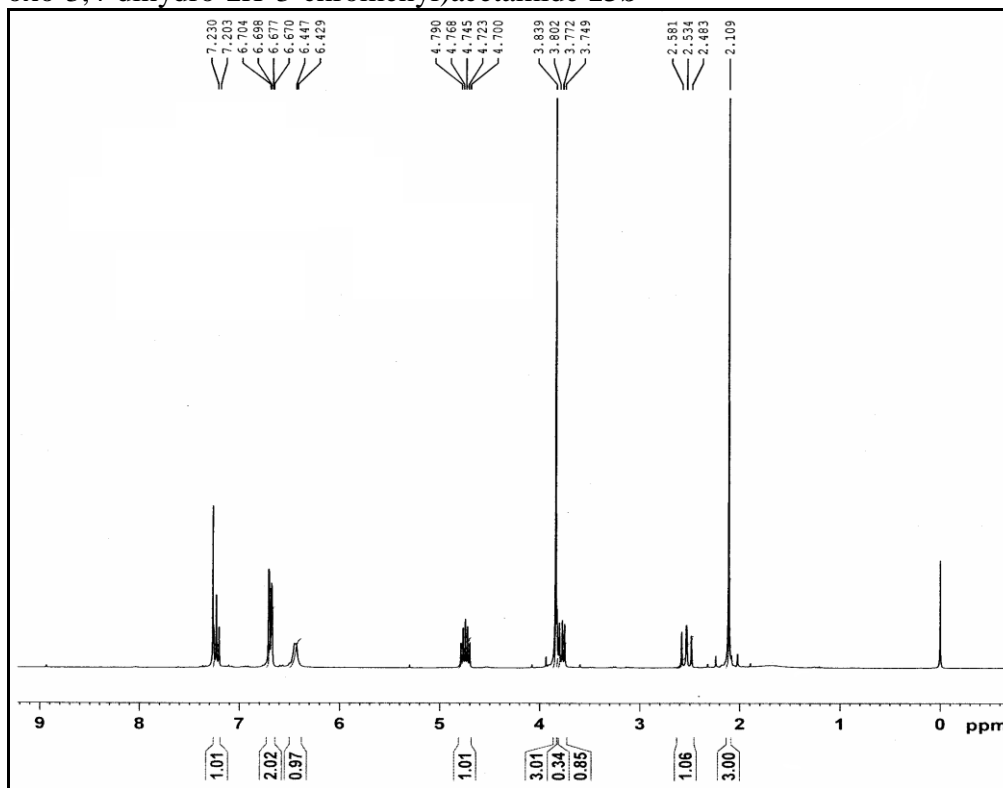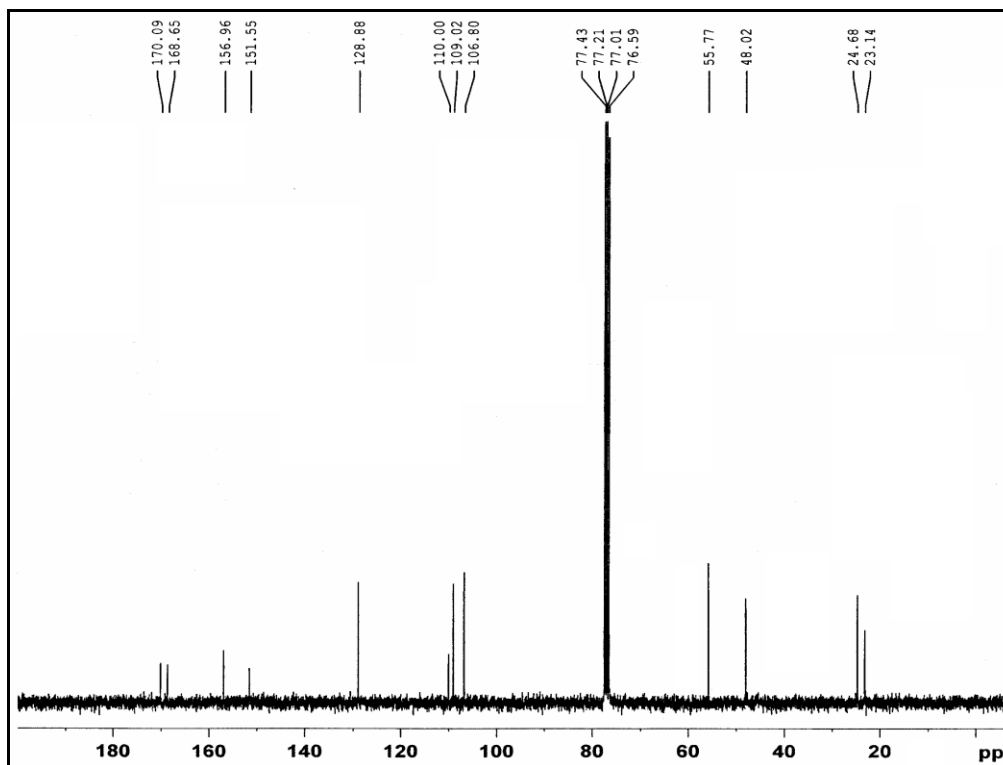

$^1\text{H}$  (300 MHz,  $\text{CDCl}_3$ ) and  $^{13}\text{C}$  (75 MHz,  $\text{CDCl}_3$ ) NMR of *N*-1-(6-methoxy-2-oxo-3,4-dihydro-2*H*-3-chromenyl)acetamide **13c**

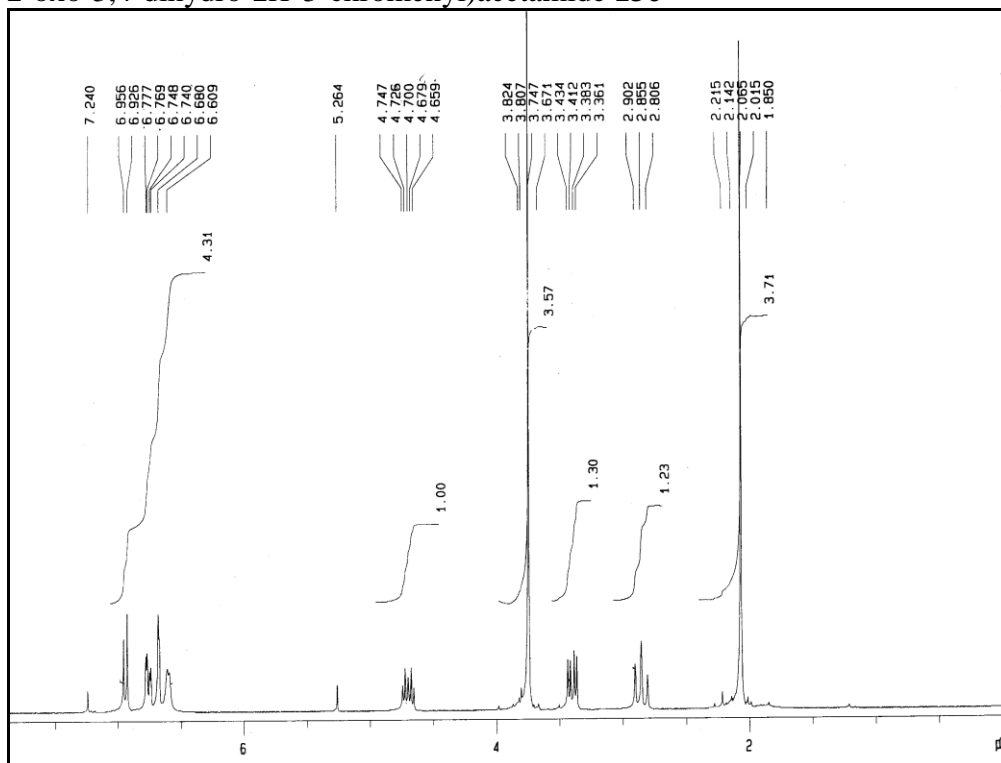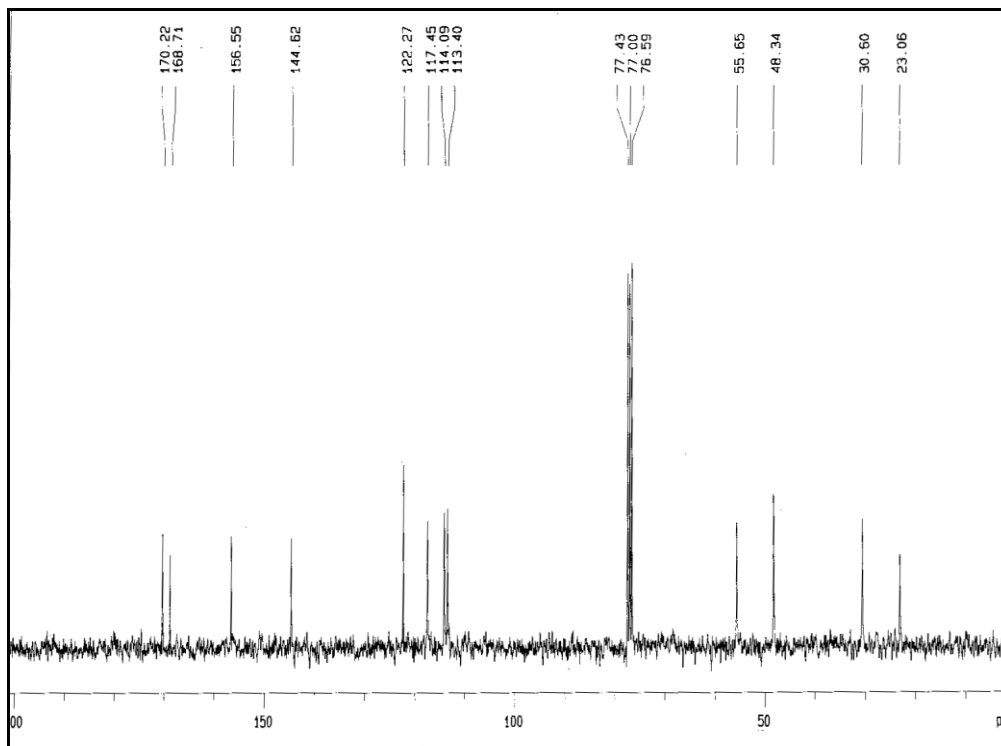

$^1\text{H}$  (300 MHz,  $\text{CDCl}_3$ ) and  $^{13}\text{C}$  (75 MHz,  $\text{CDCl}_3$ ) NMR of *N*-[7-(benzyloxy)-2-oxo-3,4-dihydro-2*H*-3-chromenyl]acetamide **13d**

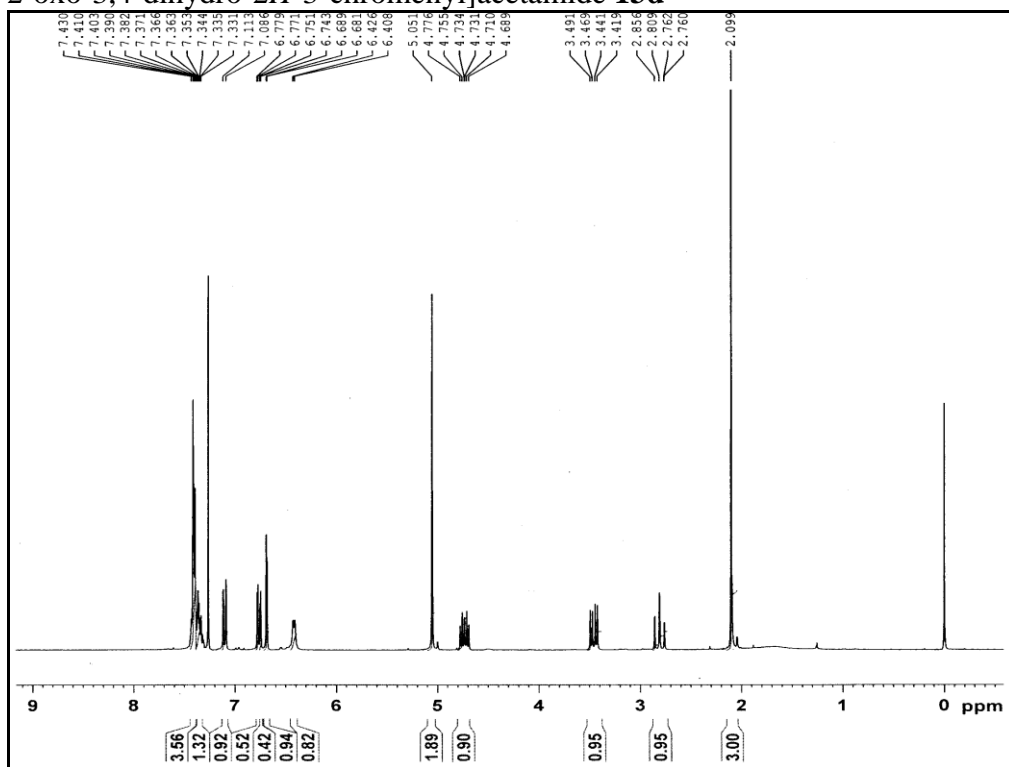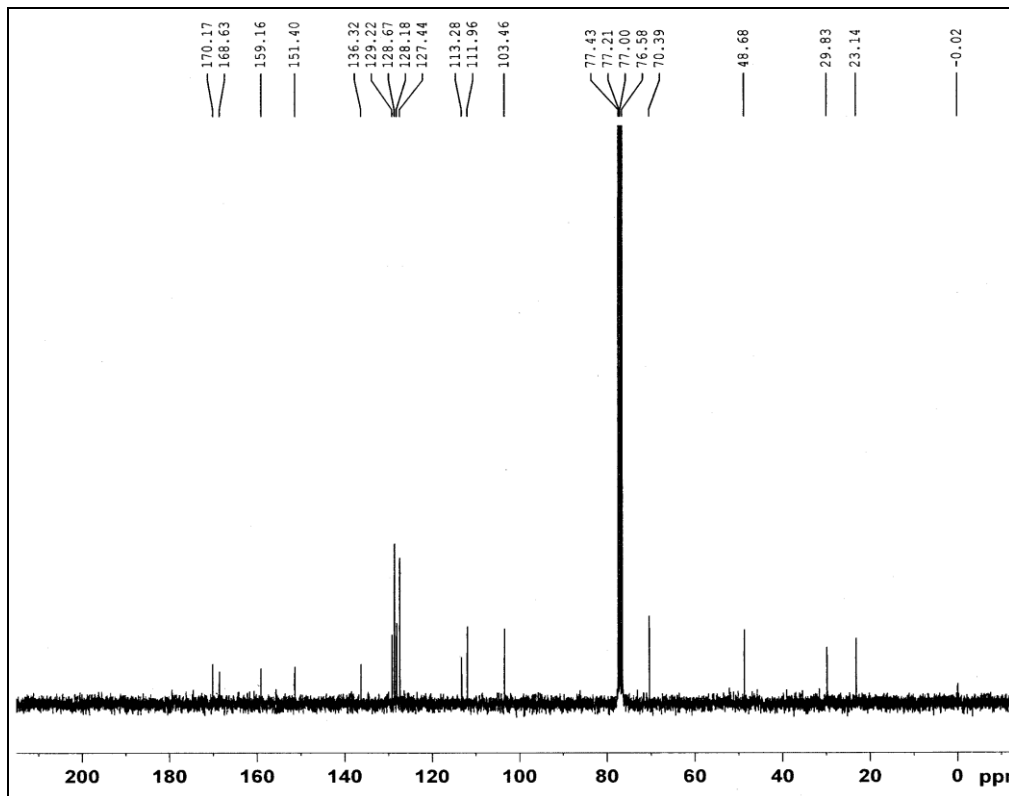

$^1\text{H}$  (300 MHz,  $\text{CDCl}_3$ ) and  $^{13}\text{C}$  (75 MHz,  $\text{CDCl}_3$ ) NMR of *N*1-(8-methoxy-2-oxo-3,4-dihydro-2*H*-3-chromenyl)acetamide **13e**

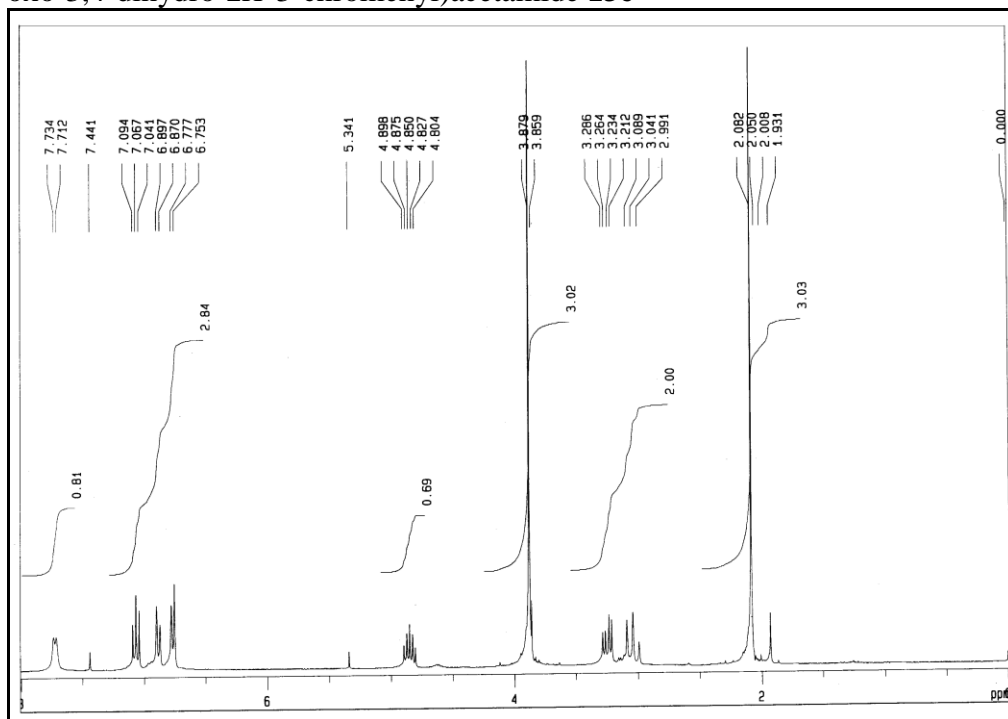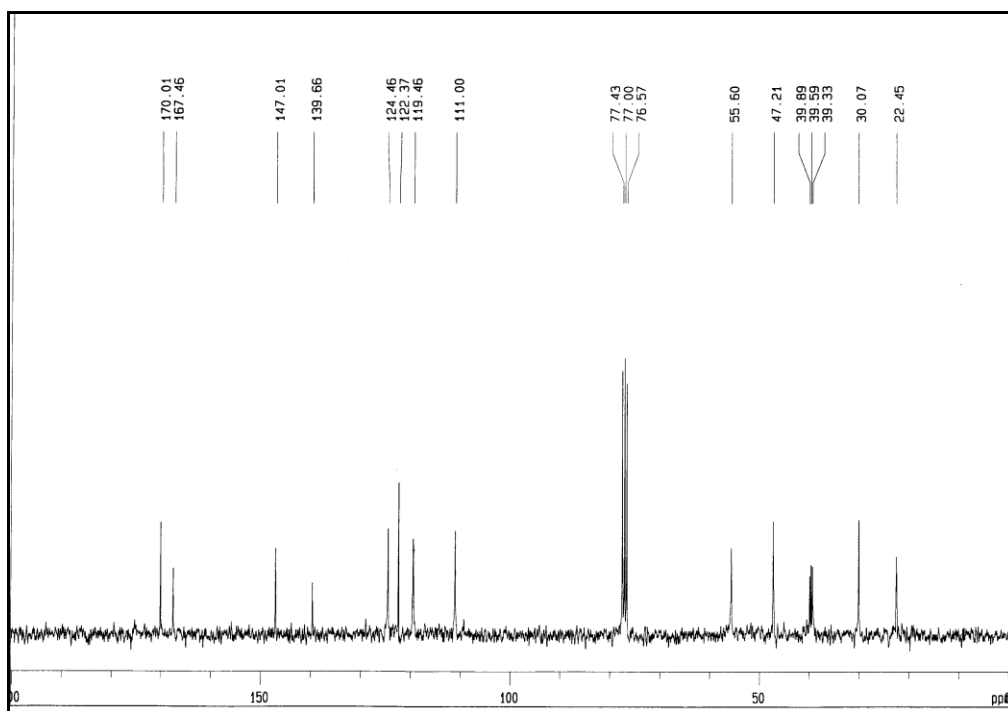

$^1\text{H}$  (300 MHz,  $\text{CDCl}_3 + \text{DMSO-D}_6$ , 9:1) and  $^{13}\text{C}$  (75 MHz,  $\text{CDCl}_3 + \text{DMSO-D}_6$ , 9:1)  
NMR of *N*-2-methyl-4-[4-(dimethylamino)phenyl]-3-nitro-4*H*-2-chromenamine **15**

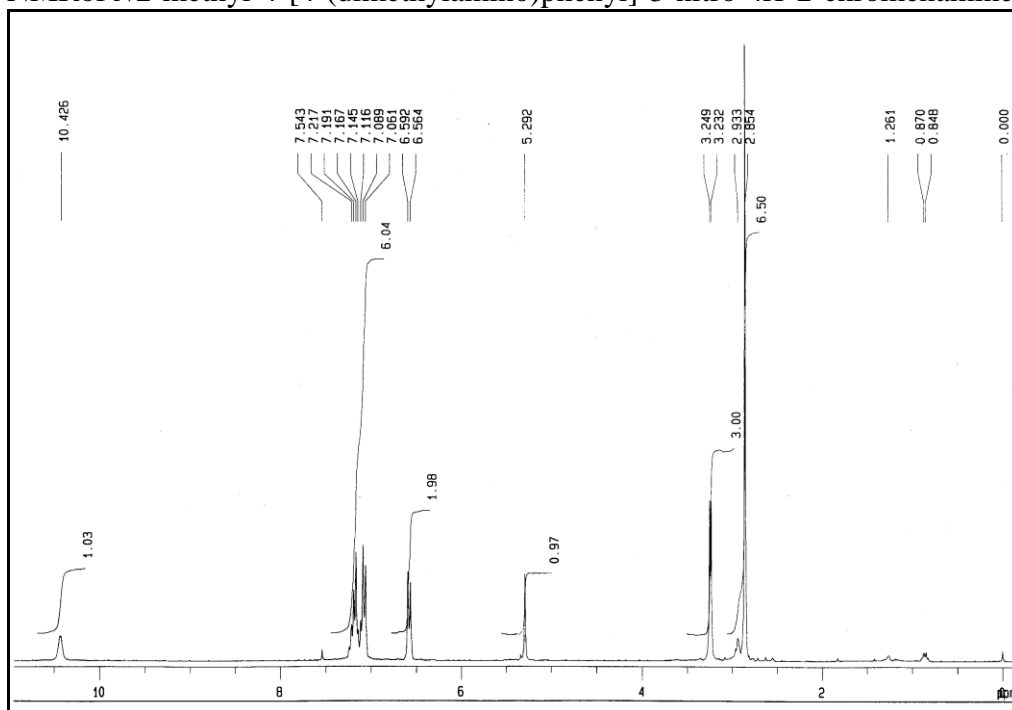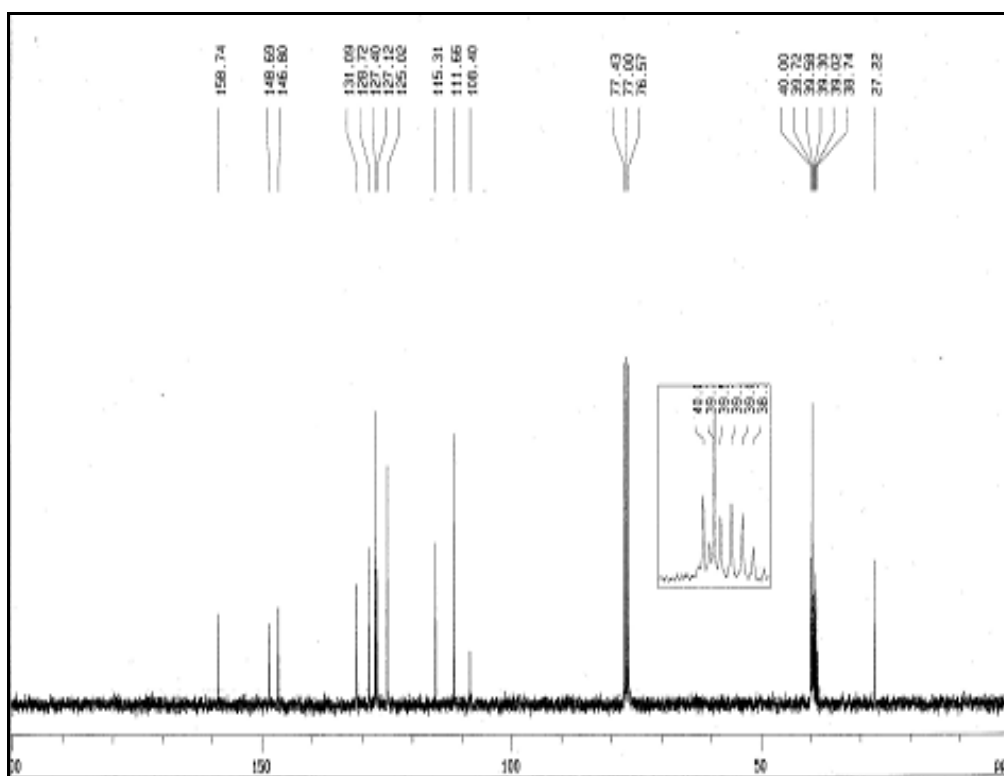

$^1\text{H}$  (400 MHz,  $\text{DMSO-}D_6$ ) and  $^{13}\text{C}$  (100 MHz,  $\text{DMSO-}D_6$ ) NMR of *N*-[4-(1*H*-3-indolyl)-3-nitro-4*H*-2-chromenyl]-*N*-methylamine **16**

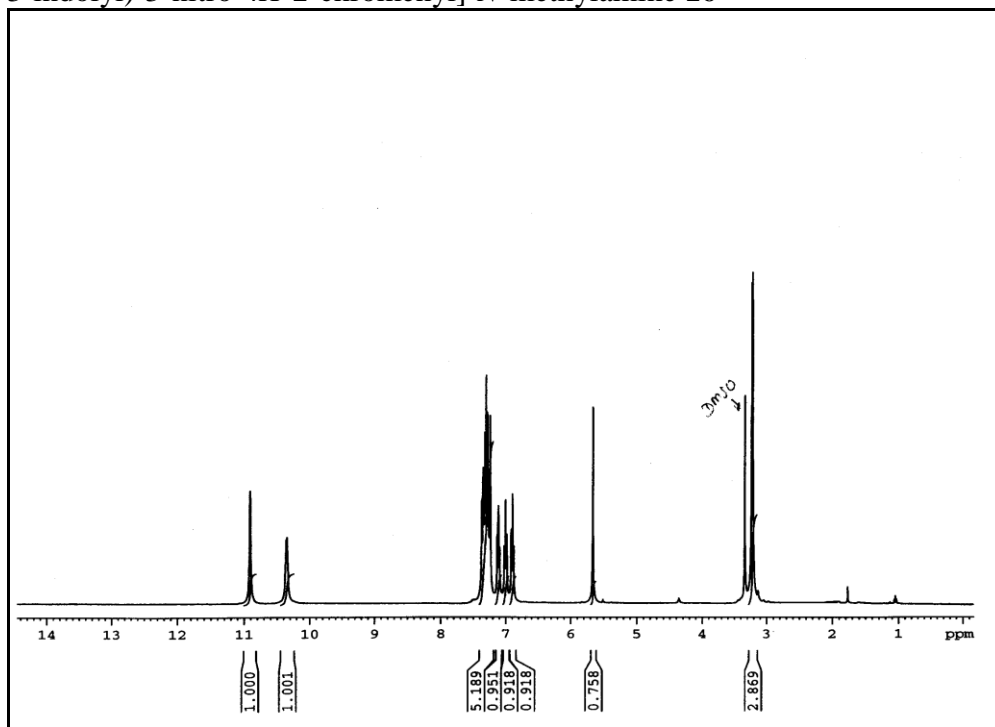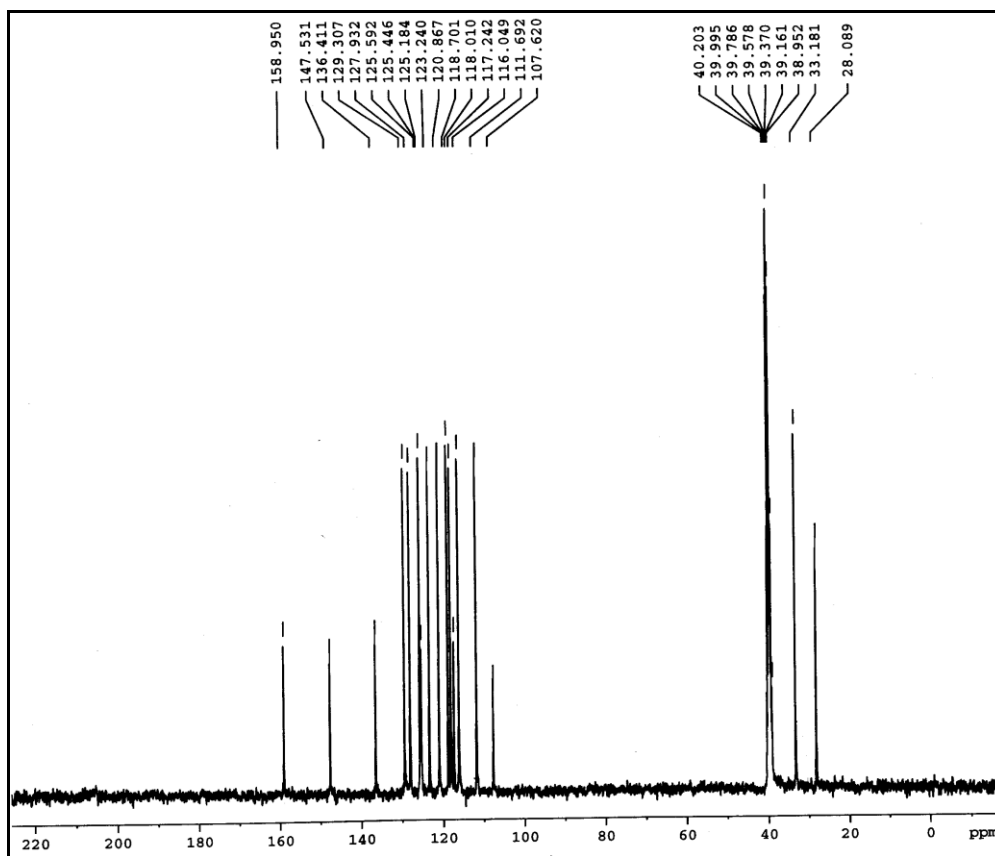



$^1\text{H}$  (400 MHz,  $\text{CCl}_4:\text{CDCl}_3$ , 1:1) and  $^{13}\text{C}$  (100 MHz,  $\text{CCl}_4:\text{CDCl}_3$ , 1:1) and  $^{13}\text{C}$   
NMR of *N*-Methyl-*N*-[3-nitro-4-(1*H*-2-pyrrolyl)-4*H*-2-chromenyl]amine **17**

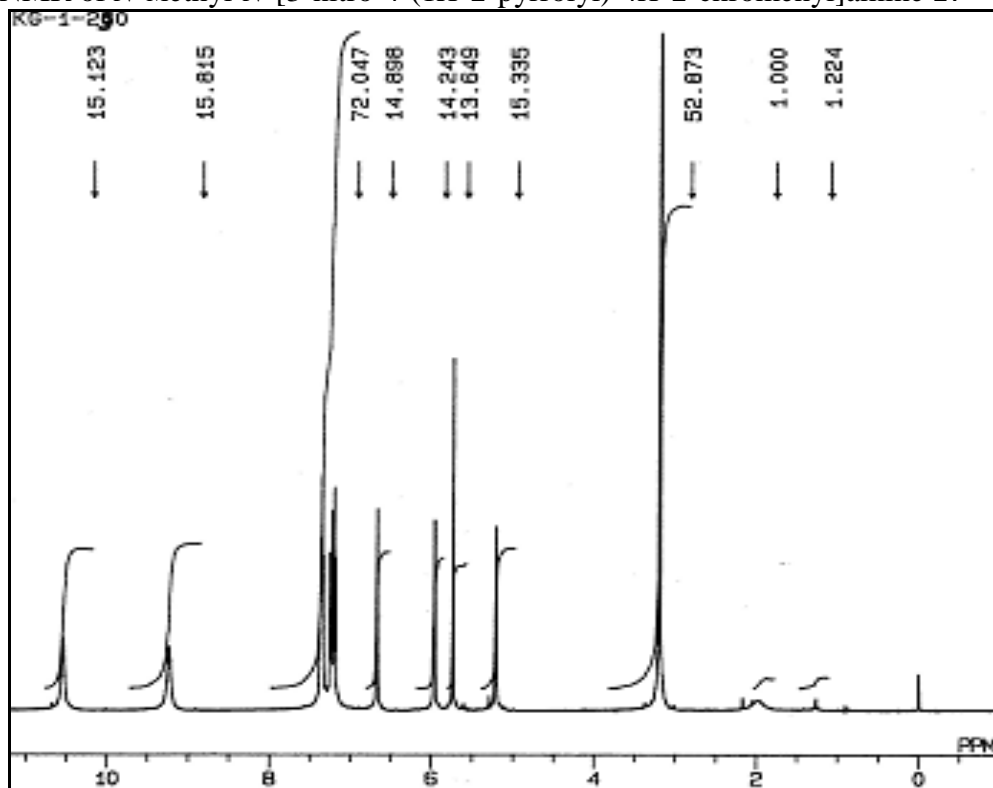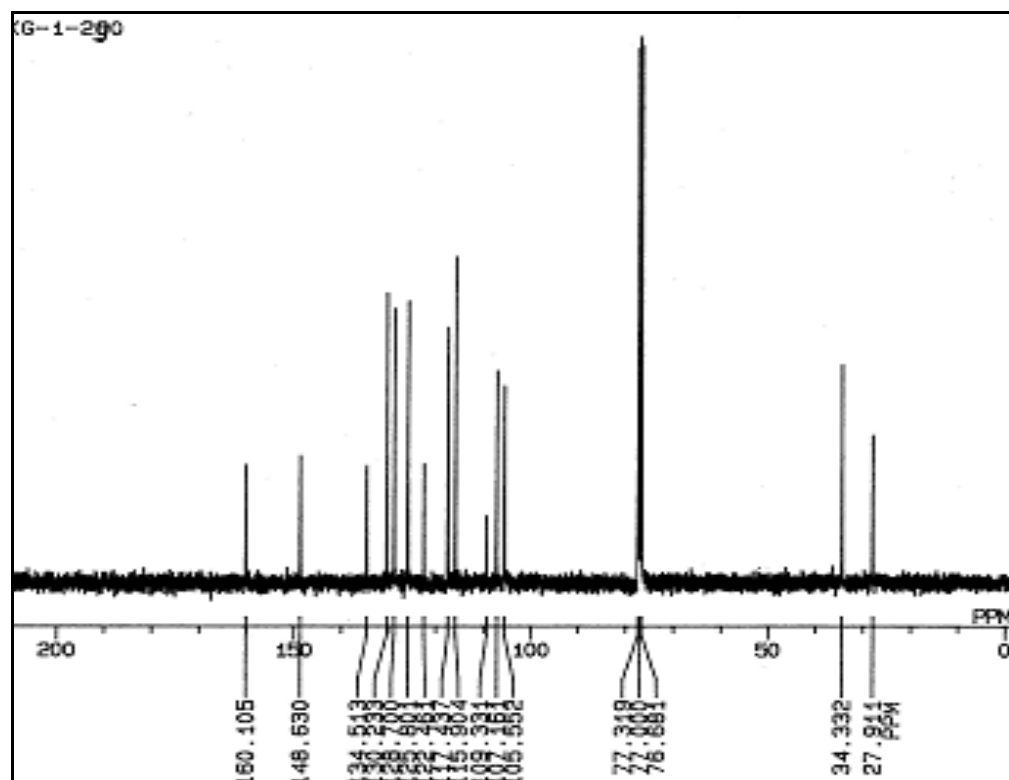

$^1\text{H}$  (300 MHz,  $\text{CDCl}_3$ ) and  $^{13}\text{C}$  (75 MHz,  $\text{CDCl}_3$ ) NMR of *N*-[4-(1*H*-3-indolyl)-2-oxo-3,4-dihydro-2*H*-3-chromenyl]acetamide **18**

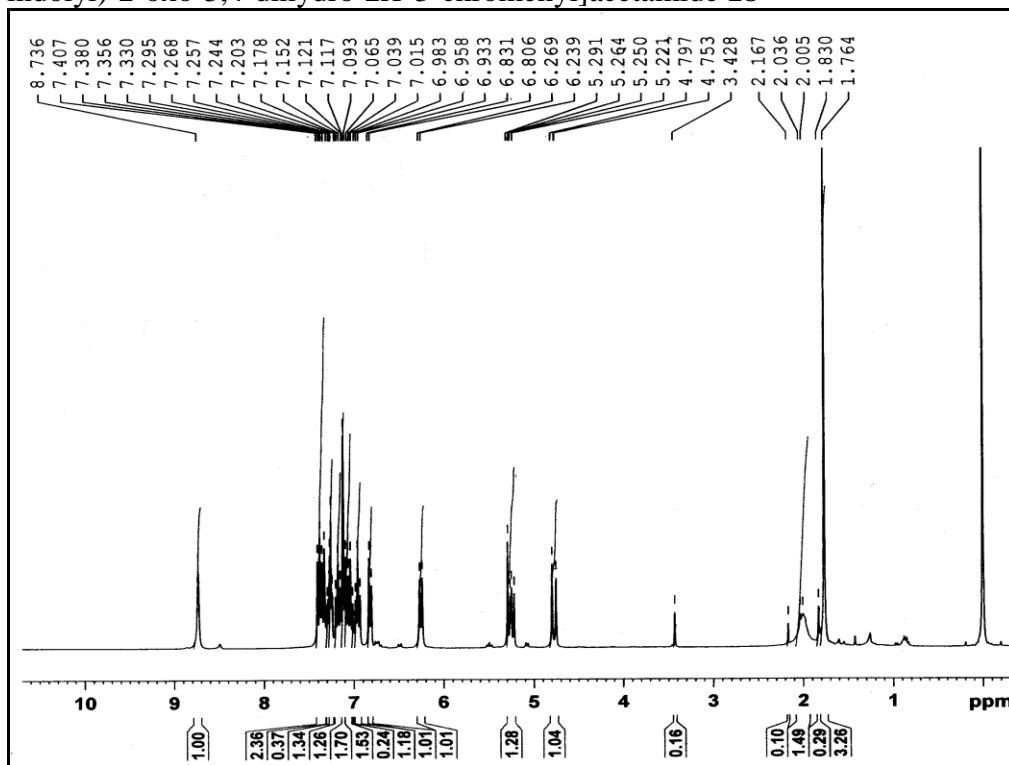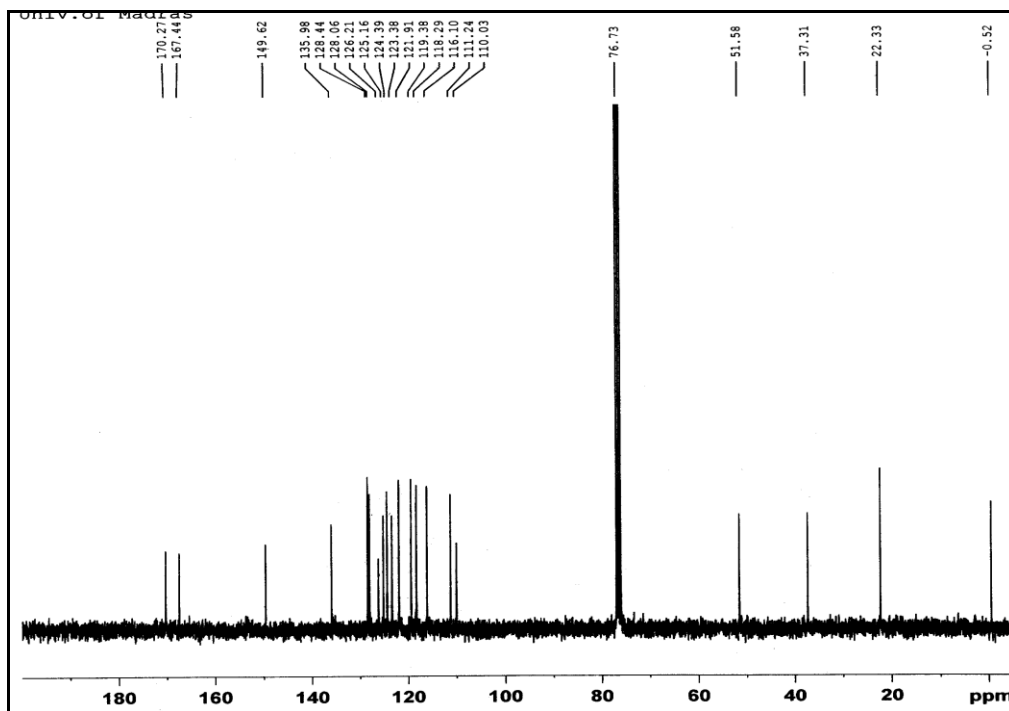

$^1\text{H}$  (300 MHz,  $\text{CDCl}_3 + \text{DMSO-D}_6$ , 9:1) and  $^{13}\text{C}$  (75 MHz,  $\text{CDCl}_3 + \text{DMSO-D}_6$ , 9:1) NMR of 3-amino-4-(1*H*-3-indolyl)-2*H*-2-chromenone **19**

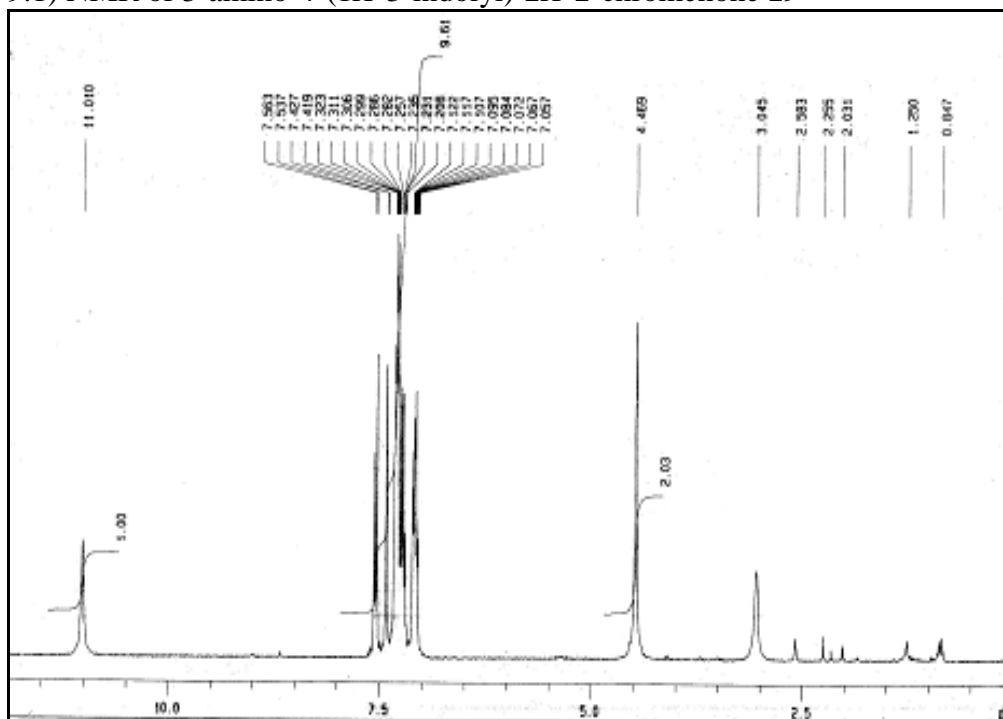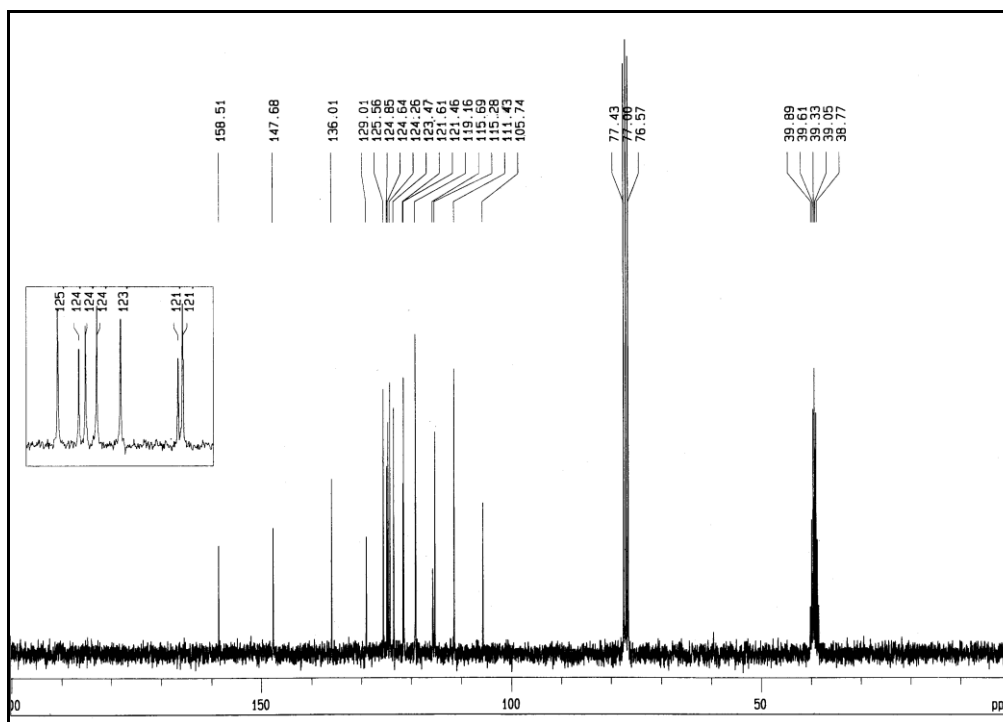

Supplement: c1ra00461a.pdf [file c1ra00461a.pdf]
